# Supplementary material for: Experimental Evolution of Legionella pneumophila in Mouse Macrophages Leads to Strains with Altered Determinants of Environmental Survival
Source: PubMed Central journal article supplement (PMC3364954; doi:10.1371/journal.ppat.1002731), 2012-05-31
Supplement: ppat.1002731.s001.pdf [file ppat.1002731.s001.pdf]

**Table S1 - Whole genome resequencing of several clones from each lineage.**

| A lineage        |               |                     |            | Day |     |     |     |
|------------------|---------------|---------------------|------------|-----|-----|-----|-----|
| genomic location | nt change     | overlapping gene(s) | aa change  | 133 | 200 | 314 | 346 |
| 324022           | G->T          | <i>sdbA</i>         | G157opal   |     |     | *   | *   |
| 375184           | C->G          | <i>rpoC</i>         | L293V      | *   |     |     |     |
| 411562           | G->A          | <i>fur</i>          | G84S       |     | *   |     |     |
| 1074316          | A->G          | <i>lpg0981</i>      | V46A       | *   |     |     |     |
| 1754709-1754710  | deletion (-2) | <i>lpg1586</i>      | frameshift |     | *   | *   | *   |
| 1991160          | C->A          | <i>fteN</i>         | D75Y       | *   | *   | *   | *   |
| 2909408          | G->C          | <i>oivA</i>         | S606opal   |     |     |     | *   |
| 3041723          | deletion (-1) | <i>lphB/pacS</i>    | intergenic |     |     | *   | *   |
| 3273231          | deletion (-1) | <i>gidB</i>         | frameshift |     | *   |     |     |

| B lineage        |               |                     |            | Day |     |     |
|------------------|---------------|---------------------|------------|-----|-----|-----|
| genomic location | nt change     | overlapping gene(s) | aa change  | 133 | 314 | 346 |
| 325402           | deletion (-1) | <i>sdbA</i>         | frameshift | *   | *   | *   |
| 395104           | C->G          | <i>rpoA</i>         | I46M       |     |     | *   |
| 930001           | T->A          | <i>fteQ</i>         | H179Q      |     |     | *   |
| 2577569-2577571  | deletion (-3) | <i>uqpQ</i>         | K99del     |     | *   |     |
| 2915886          | G->T          | <i>sidF</i>         | G848ochre  |     | *   |     |
| 3041723          | deletion (-1) | <i>lphB/pacS</i>    | intergenic |     |     | *   |
| 3084284          | T->A          | <i>lqsS</i>         | N336Y      | *   | *   | *   |
| 3356904          | deletion (-1) | <i>argD</i>         | frameshift | *   | *   | *   |

| C lineage        |                 |                      |               | Day |     |      |
|------------------|-----------------|----------------------|---------------|-----|-----|------|
| genomic location | nt change       | overlapping gene(s)  | aa change     | 90  | 180 | 180' |
| 897851           | G->T            | <i>clpA</i>          | R646M         |     |     | *    |
| 960031-960032    | insertion (TGC) | <i>dapE</i>          | A346_T347insA |     |     | *    |
| 1680473          | C->G            | <i>lssE (cdgS19)</i> | synonymous    |     | *   |      |
| 1991063          | A->G            | <i>fteN</i>          | V107A         |     | *   |      |
| 2910291          | C->A            | <i>oivA</i>          | E313ochre     | *   | *   | *    |

| D lineage        |               |                     |            | Day |    |     |
|------------------|---------------|---------------------|------------|-----|----|-----|
| genomic location | nt change     | overlapping gene(s) | aa change  | 45  | 90 | 180 |
| 323591           | deletion (-1) | <i>sdbA</i>         | frameshift |     |    | *   |
| 1990881-1990883  | deletion (-3) | <i>fteN</i>         | V168del    | *   |    |     |
| 2026944          | G->A          | <i>lysC/A</i>       | G813R      |     | *  | *   |
| 2317543          | C->A          | <i>dam/lpg2076</i>  | intergenic |     |    | *   |
| 3262574          | G->A          | <i>metG</i>         | synonymous |     | *  | *   |

Illumina reads were aligned by reference assembly to both the published *L. pneumophila* Philadelphia-1 genome and to contigs from the progenitor strain. These alignments were used to identify mutations present in each strain. Each individual mutation was observed in isolates marked with an asterisk. Strain names in italics represent time-points and clones chosen for sequencing in order to explain population behavior identified in Figure 2. Two isolates from day 180 of the C lineage were sequenced, day 180 and day 180'.
